# Supplementary material for: Discovery of γ-Mangostin as an Amyloidogenesis Inhibitor
Source: PubMed Central journal article supplement (PMC4550876; doi:10.1038/srep13570), 2015-08-27
Supplement: srep13570-s1.pdf [file srep13570-s1.pdf]

## SUPPORTING INFORMATION

# Discovery of $\gamma$ -Mangostin as an Amyloidogenesis Inhibitor

*Takeshi Yokoyama<sup>a</sup>, Mitsuharu Ueda<sup>b</sup>, Yukio Ando<sup>b</sup>, Mineyuki Mizuguchi<sup>a\*</sup>*

<sup>a</sup> *Faculty of Pharmaceutical Sciences, University of Toyama, 2630 Sugitani, Toyama  
930-0914, Japan*

<sup>b</sup> *Department of Neurology, Graduate School of Medical Sciences, Kumamoto  
University, 1-1-1 Honjo, Kumamoto 860-8556, Japan*

### **Corresponding Author**

\* M. Mizuguchi e-mail: [mineyuki@pha.u-toyama.ac.jp](mailto:mineyuki@pha.u-toyama.ac.jp);

Supplementary Table S1 and S2 and Supplementary Figures S1, S2, S3, S4  
and S5

Supplementary Table S1. Statistics on X-ray data collection and structure refinement

|                                      | $\gamma$ -M                              | $\alpha$ -M                              | <b>2</b>                                 | $\gamma$ -M - Br                         | $\alpha$ -M - Br                         |
|--------------------------------------|------------------------------------------|------------------------------------------|------------------------------------------|------------------------------------------|------------------------------------------|
| <b>Crystal data</b>                  |                                          |                                          |                                          |                                          |                                          |
| Wavelength (Å)                       | 1.0                                      | 1.0                                      | 1.0                                      | 0.91714                                  | 0.91714                                  |
| Resolution range <sup>a</sup> (Å)    | 33.2–1.5<br>(1.53–1.5)                   | 27.6–1.4<br>(1.42–1.40)                  | 30.2–1.9<br>(1.93–1.90)                  | 28.6–1.5<br>(1.53–1.5)                   | 28.5–1.5<br>(1.53–1.5)                   |
| Space group                          | <i>P</i> 2 <sub>1</sub> 2 <sub>1</sub> 2 | <i>P</i> 2 <sub>1</sub> 2 <sub>1</sub> 2 | <i>P</i> 2 <sub>1</sub> 2 <sub>1</sub> 2 | <i>P</i> 2 <sub>1</sub> 2 <sub>1</sub> 2 | <i>P</i> 2 <sub>1</sub> 2 <sub>1</sub> 2 |
| Unit cell (Å)                        | a=43.4,<br>b=85.8,<br>c=64.1             | a=43.6,<br>b=85.4,<br>c=64.7             | a=43.0,<br>b=85.2,<br>c=64.5             | a=43.4,<br>b=85.7,<br>c=63.4             | a=43.1,<br>b=85.6,<br>c=63.6             |
| Observed reflections                 | 230,024                                  | 279,805                                  | 114,965                                  | 333,433                                  | 274,834                                  |
| Unique reflections <sup>a</sup>      | 38,590 (1,835)                           | 48,115 (2,339)                           | 17,994 (823)                             | 38,151 (1,854)                           | 38,146 (1,812)                           |
| $R_{\text{merge}}$ (%) <sup>ab</sup> | 4.5 (27.4)                               | 6.0 (73.5)                               | 9.0 (61.1)                               | 8.2 (40.3)                               | 7.2 (3.8)                                |
| Completeness (%) <sup>a</sup>        | 97.7 (95.6)                              | 99.3 (98.2)                              | 91.7 (88.2)                              | 99.5 (99.0)                              | 98.3 (95.2)                              |
| $I/\sigma(I)$ <sup>a</sup>           | 49.6 (4.3)                               | 26.7 (1.8)                               | 21.0 (1.9)                               | 37.9 (3.6)                               | 24.7 (2.3)                               |
| Redundancy <sup>a</sup>              | 6 (3.8)                                  | 5.8 (4.7)                                | 6.3 (3.9)                                | 8.7 (5.8)                                | 7.2 (3.8)                                |
| <b>Refinement data</b>               |                                          |                                          |                                          |                                          |                                          |
| $R_{\text{factor}}^c$ (%)            | 18.4                                     | 19.2                                     | 19.6                                     | 19.3                                     | 20.4                                     |
| $R_{\text{free}}^d$ (%)              | 21.9                                     | 23.5                                     | 24.8                                     | 22.1                                     | 24.0                                     |
| R.M.S.D. bonds (Å)                   | 0.014                                    | 0.015                                    | 0.007                                    | 0.016                                    | 0.019                                    |
| R.M.S.D. angles (°)                  | 1.9                                      | 1.8                                      | 1.1                                      | 1.9                                      | 2.1                                      |
| No. of water and halide              | 181, 4                                   | 239, 2                                   | 91, –                                    | 176, 8                                   | 173, 6                                   |
| Average B factor (Å <sup>2</sup> )   |                                          |                                          |                                          |                                          |                                          |
| protein, ligand,                     | 19.1, 22.6,                              | 18.1, 15.9,                              | 19.5, 25.8,                              | 19.1, 16.6,                              | 20.0, 20.2                               |
| halide ion, water                    | 31.5, 32.8                               | 31.5, 32.7                               | –, 23.2                                  | 36.7, 30.6                               | 39.4, 32.7                               |
| Ramachandran plot (%)                |                                          |                                          |                                          |                                          |                                          |
| Favored, allowed                     | 98, 2                                    | 98, 2                                    | 96, 4                                    | 98, 2                                    | 99, 1                                    |

<sup>a</sup> Numbers in parentheses refer to the highest resolution shell.

<sup>b</sup>  $R_{\text{merge}} = \sum_{hkl} \sum_i |I_i(hkl) - I_i(\bar{h}\bar{k}\bar{l})| / \sum_{hkl} \sum_i I_i(hkl)$

<sup>c</sup>  $R_{\text{factor}} = \sum |F_o| - |F_c| / |F_o|$ , where  $F_o$  and  $F_c$  are the observed and calculated structure factor amplitudes, respectively.

<sup>d</sup> The  $R_{\text{free}}$  was calculated with 5% of the data excluded from the refinement.

Supplementary Table S2. Experimental condition of X-ray diffraction.

|                        | $\gamma$ -M | $\alpha$ -M | <b>2</b>  | $\gamma$ -M - Br | $\alpha$ -M - Br |
|------------------------|-------------|-------------|-----------|------------------|------------------|
| X-ray source           | PF-AR       | PF-AR       | PF-AR     | PF-AR            | PF-AR            |
| beamline               | NE-3A       | NW12        | NW12      | NE-3A            | NE-3A            |
| Detector               | ADSC Q270   | ADSC Q210   | ADSC Q210 | ADSC Q270        | ADSC Q270        |
| Exposure time (s)      | 0.2         | 1.8         | 6.0       | 0.3              | 0.4              |
| Detector distance (mm) | 167.9       | 117.3       | 166.2     | 188.6            | 188.6            |
| Oscillation width (°)  | 0.4         | 1.0         | 1.0       | 1.0              | 1.0              |
| Frame number           | 500         | 180         | 300       | 300              | 300              |
| Oscillation range (°)  | 200         | 180         | 300       | 300              | 300              |

Supplementary Figure S1. The EC<sub>50</sub> values and *t*-test.

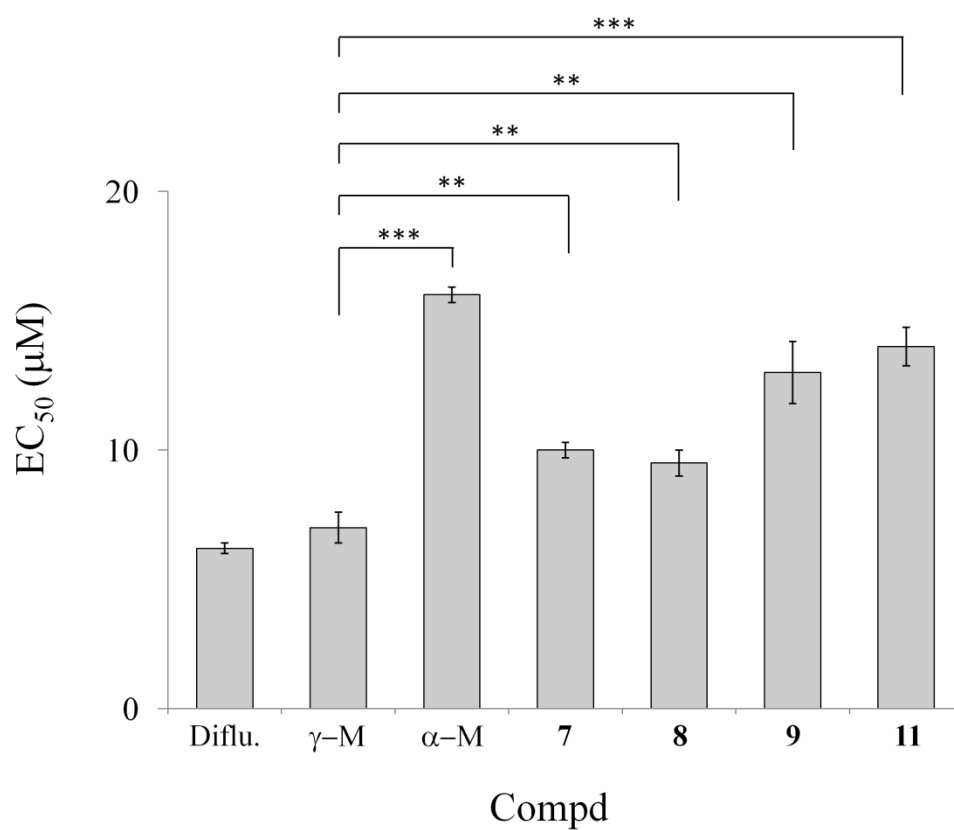

Supplementary Figure S1. One-tailed *t*-test was performed between  $\gamma$ -M and the selected compounds with 0.05 of significance level. \*\* indicates  $p < 0.01$  and \*\*\* indicates  $p < 0.001$ .

Supplementary Figure S2. Concentration-dependent effect in the intrinsic fluorescent and resveratrol competitive experiments.

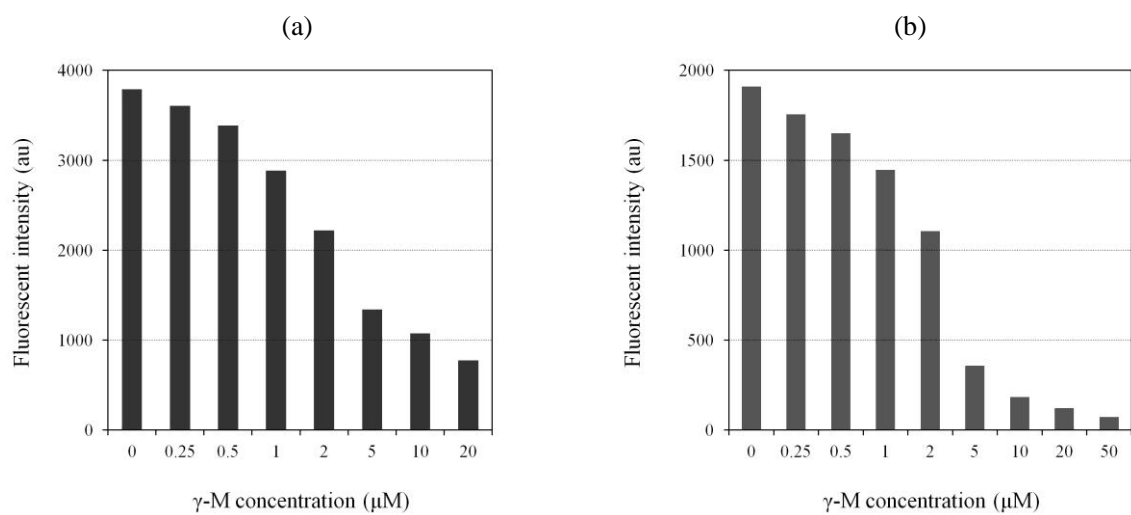

Supplementary Figure S2. (a) Fluorescent intensities at 340 nm at the various  $\gamma$ -M concentrations in the intrinsic fluorescent experiments. (b) Fluorescent intensities at 400 nm at the various  $\gamma$ -M concentrations in the resveratrol competitive binding assay.

Supplementary Figure S3. The quaternary structural stability of V30M mutant TTR in the presence of compounds.

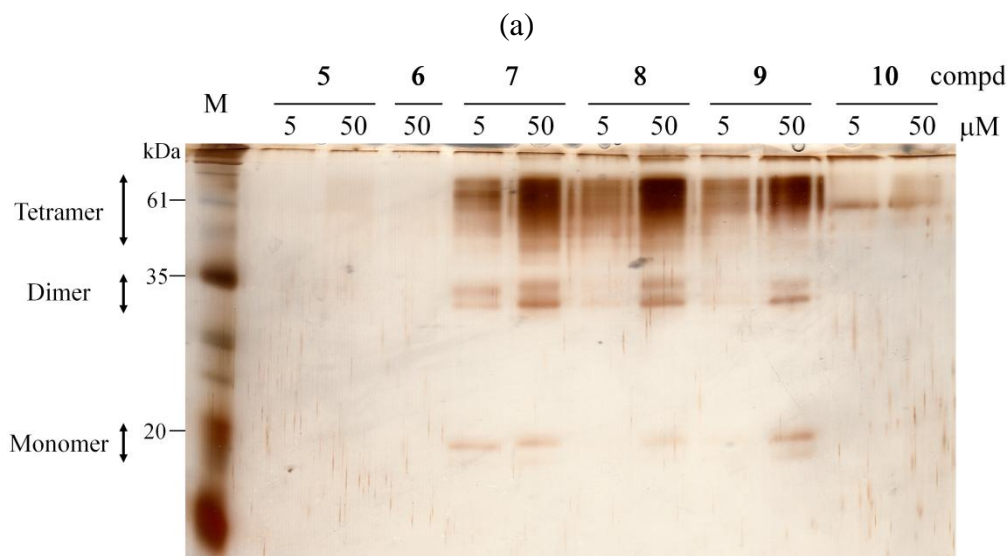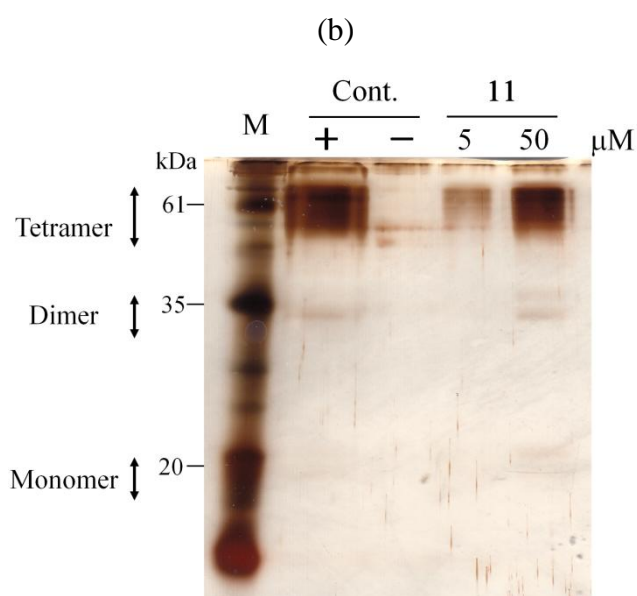

Supplementary Figure S3. Glutaraldehyde cross-linking experiments using compounds **5**, **6**, **7**, **8**, **9** and **10** (a) and the control and **11** (b). The concentrations of the compounds were 5 and 50 μM. The + lane of Cont. indicates the positive control incubated at pH 8.0 without the compounds. The - lane indicates the negative control incubated at pH 4.5 without the compounds.

Supplementary Figure S4. The relative tetramer fractions at 50  $\mu\text{M}$  compounds and inhibition ratio at 20  $\mu\text{M}$  compounds.

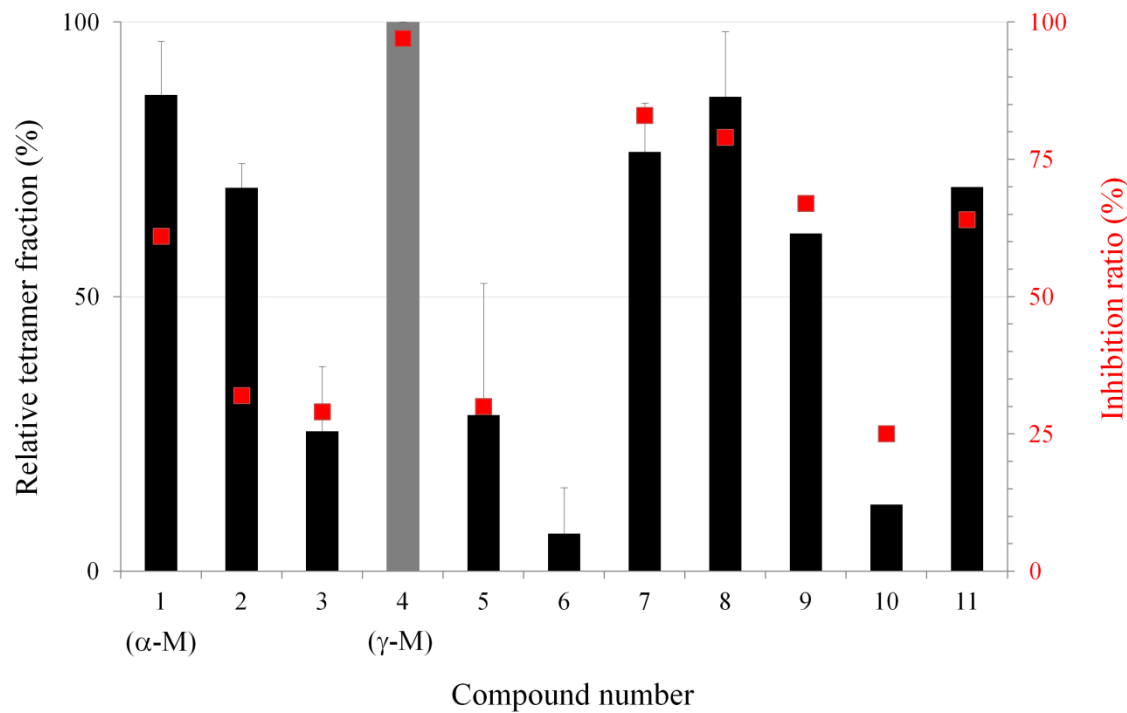

Supplementary Figure S4. The tetramer fractions at 50  $\mu\text{M}$  compounds relative to  $\gamma\text{-M}$  (3.6  $\mu\text{M}$  V30M) were indicated as the column bars with the standard deviations (left side axis). The tetramer fractions were quantified by the glutaraldehyde cross-linking experiments. Inhibition ratios were indicated as red-filled square (right side axis). The inhibition ratio of **6** was not determined because of its low inhibitory potency.
